# Supplementary material for: Ultralight magnetic aerogels from Janus emulsions
Source: Royal Society of Chemistry journal article supplement (doi:10.1039/c9ra10247g), 2020-01-01
Supplement: c9ra10247g1.pdf [file c9ra10247g1.pdf]

## Supporting Information

### Ultralight Magnetic Aerogels from Janus Emulsions

Rajarshi Roy Raju,<sup>a</sup> Ferenc Liebig,<sup>a</sup> Bastian Klemke,<sup>b</sup> Joachim Koetz<sup>a,\*</sup>

<sup>a</sup>Institute of Chemistry, University of Potsdam, 14476 Potsdam, Germany

<sup>b</sup>Helmholtz-Zentrum Berlin für Materialien und Energie, Lise Meitner Campus, 14109  
Berlin, Germany

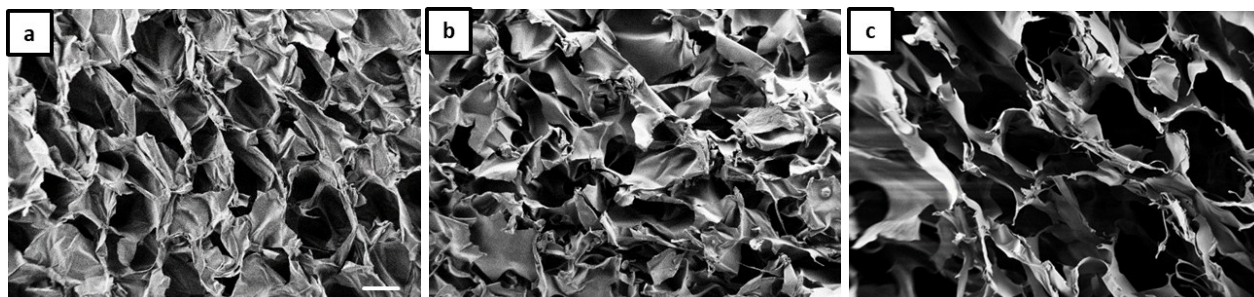

**Figure S1:** SEM micrographs (scale 100  $\mu$ m) of aerogels prepared from an aqueous solution of a) 1 wt% gelatin b) 1 wt% NaCMC c) 1 wt% gelatin/NaCMC mixture.

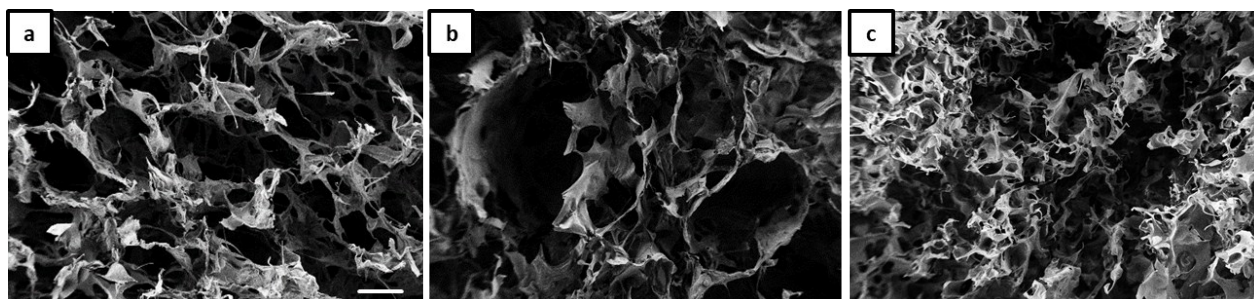

**Figure S2:** SEM micrographs (scale 100  $\mu$ m) of aerogels prepared from emulsions with a 1 wt% aqueous gelatin/NaCMC mixture and a) olive oil b) silicone oil c) mixture of olive and silicone oil

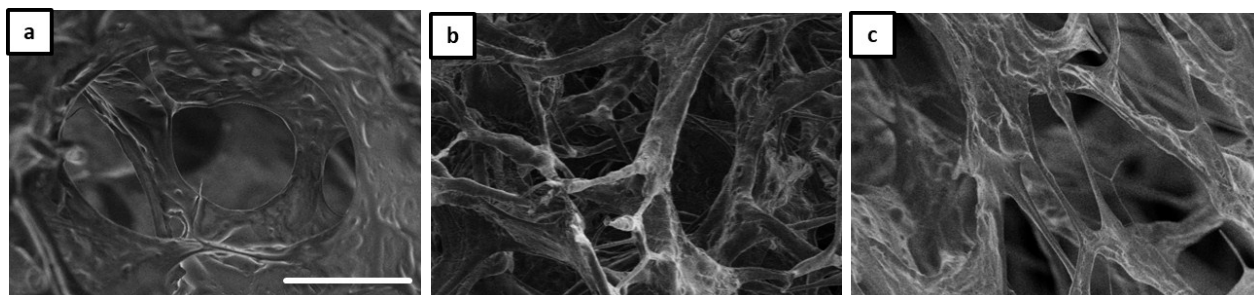

**Figure S3:** Enlarged SEM micrographs (scale 50 $\mu$ m) of magnetic Janus hydrogel-based aerogels presented in Figure 2

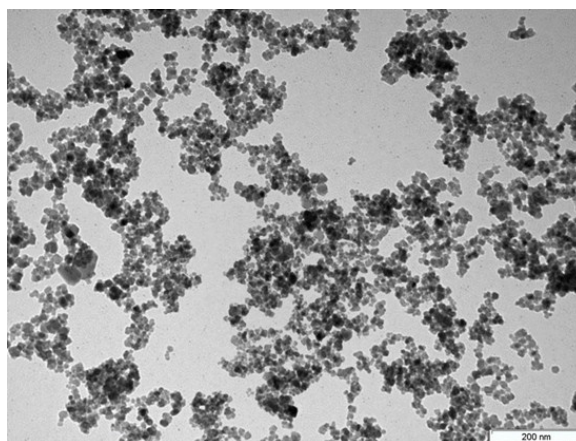

**Figure S4:** TEM micrograph of purified magnetite nanoparticles
